# Supplementary material for: Subgroup Analyses of Maraviroc in Previously Treated R5 HIV-1 Infection
Source: Atypon-hosted journal article supplement (doi:10.1056/nejmoa0803154), 2008-10-01
Supplement: nejm_fatkenheuer_1442sa1.pdf [file nejm_fatkenheuer_1442sa1.pdf]

## Supplementary Appendix

This appendix has been provided by the authors to give readers additional information about their work.

Supplement to: Fätkenheuer G, Nelson M, Lazzarin A, et al. Subgroup analyses of maraviroc in previously treated R5 HIV-1 infection. *N Engl J Med* 2008;359:1442-55.

## **Study investigators**

### **MOTIVATE 1**

#### **Canada**

Jonathan Angel, Brian Conway, Kevin A. Gough, Richard G. Lalonde, Francois Laplante, Roger P. Leblanc, Julio S.G. Montaner, Anita R. Rachlis, Barbara Romanowski, Stuart J. Rosser, Ethan Rubinstein, Stephen David Shafran, Fiona Smail, Cecile Tremblay, Benoit Trottier, Sylvie Trottier, Christos Tsoukas, Sharon Lynn Walmsley.

#### **United States of America**

Alen Voskanian, Bisher Akil, Roberto Claudio Arduino, David Asmuth, George William Beatty, Stephen Lawrence Becker, Nicholas C. Bellos, Sky Robert Blue, Robert Key Bolan, John D. Brand, George Ghazaros Burnazian, Alfred F. Burnside, Thomas B. Campbell, Rafael E. Campo, Kathleen King Casey, Paul Joseph Cimoch, Calvin J. Cohen, Gregg Oscar Coodley, Roberto B. Corales, Edwin DeJesus, Leslie E. Diaz, George L. Drusano, Jerome A. Ernst, Judith E. Feinberg, Lawrence Edward Feldman, Steven M. Fine, Jason Andrew Flamm, Stephen Eliot Follansbee, Todd Allen Fralich, Emanuel Gallant, Eliot Warren Godofsky, Gary Green, Paula Rosa Greiger-Zanlungo, Barbara Marie Gripshover, Richard K. Groger, Roy Gulick, William David Hardy, Shawn K. Hassler, Richard Harold Haubrich, Stephen P. Hauptman, David Holden Henry, William Keith Henry, Jose Norberto Hernandez, Charles Byron Hicks, Michael Alan Horberg, Joseph G. Jemsek, Allan Rowan Kelly, Clifford A. Kinder, Daniel Benjamin Klein, Laura Kogelman, Jacob Paul Lalezari, Anthony LaMarca, Harry William Lampiris, Matthew Leibowitz, Jason Mark Leider, Jeffrey Lloyd Lennox, Ralph Liporace, Harold Luther Martin, Lucia M. Martinez-Bejar, Claudia Martorell, Joseph P. McGowan, Donna Mildvan, Steven Miles, Ronald Takeshi Mitsuyasu, Javier Osvaldo Morales-Ramirez, Anne B. Morris, Karam Chucri Mounzer, Robert Anderson Myers, Jeffrey P. Nadler, Daniel Pearce, Gerald Pierone, Bruce Stephen Rashbaum, Jayashree Ravishankar, Robert Ray Redfield, Richard Craig Reichman, William Jay Robbins, Stockton Edward Roberts, Jorge E. Rodriguez, Michael Saag, Kunthavi Sathasivam, Paul Edward Sax, Lawrence E. Schwartz, Sorana Segal-Maurer, Michael Grant Sension, Gladys E. Sepulveda-Arzola, Paul Richard Skolnik, Louis Marshall Sloan, Robert P. Smith, James Michael Sosman, Jack Thomas Stapleton, Roy Steigbigel, Corklin R. Steinhart, Donna Elaine Sweet, Susan Swindells, Pablo Tebas, Melanie Ann Thompson, Silver Sisneros, William James Towner, Peter Gordon. Trevor N. Hawkins, David Allen Wheeler, Sally Williams, Dean Wilcox, Steven Williams, Todd Stephen Wills, Michael Bruce Wohlfeiler, David Wright, Angela Xavier, Bienvenido Gamulo Yangco, Barry Stephen Zingman, Carmen D. Zorrilla.

### **MOTIVATE 2**

#### **Australia**

Anthony M. Allworth, Mark T. Bloch, Neil J. Bodsworth, John Chuah, David Cooper, Nicholas Doong, Dominic Dwyer, Julian Gold, Jennifer Frances Hoy, Richard J. Moore, Norman J. Roth, Cassy Workman.

#### **Belgium**

Nathan Clumeck, Patricia Dellot, Jean Christophe Goffard, Michel Moutschen, Bernard C. Vandercam, Dirk Vogelaers.

**France**

Michele Bentata, Laurent Cotte, Jean-Francois Delfraissy, Jacques Durant, Pierre-Marie Girard, Laurent Hocqueloux, Roland Landman, Alain Lafeuillade, Isabelle Poizot Martin, Jean-Michel Molina, Gilles Pialoux, Christophe Piketty, Francois Raffi, Jacques Reynes, Renaud Verdon.

**Germany**

Keikawus Arasteh, Johannes Richard Bogner, Norbert H. Brockmeyer, Stefan Esser, Gerd Fätkenheuer, Frank-Detlef Goebel, Thomas Harrer, Peter Kern, Heribert Knechten, Jan van Lunzen, Markus Mueller, Antonius Mutz, Mark Oette, Andreas Plettenberg, Juergen Rockstroh, Jorg-Andres Rump, Reinhold E. Schmidt, Lothar Schneider, Dieter Schuster, Schlomo Staszewski, Hans-Juergen Stellbrink, Andreas Trein, Lutwinus Weitner.

**Italy**

Fernando Aiuti, Dante Bassetti, Antonio Di Biagio, Pietro Caramello, Giampiero Carosi, Roberto Esposito, Adriano Lazzarin, Francesco Leoncini, Paolo Emilio Manconi, Francesco Mazzotta, Francesco Montella, Enzo Raise, Vincenzo Vullo.

**Netherlands**

Ilja Mohandas Hoepelman, Rosalinde Maria Perenboom, J. M. Prins, Clemens Richter, Marchina Elisabeth Van Der Ende.

**Poland**

Marek Beniowski, Anna Boron-Kaczmarek, Robert Flisiak, Waldemar Halota, Andrzej Horban, Tomasz Mach, Tomasz Smiatacz.

**Spain**

Fernando Lozano de Leon, Pompeyo Viciano Fernandez, Rafael Rubio Garcia, Jose Josep Gatell Artigas, Juan Julian Gonzalez Garcia, Felix Gutierrez, Juan Gonzalez Lahoz, Jose Iribarren Loyarte, Santiago Moreno, Federico Pulido Ortega, Pere Domingo Pedrol, Antonio Rivero, Bonaventura Clotet, Cristina Sarria.

**Sweden**

Magnus Gisslen, Leo Flamholz, Anders Karlsson.

**Switzerland**

Manuel Battegay, Enos Bernasconi, Matthias Cavassini, Henning Drechsler, Bernard Hirschel, Milos Opravil, Pietro Vernazza.

**United Kingdom**

Philippa Jane Easterbrook, Martin Fisher, Philip Hay, Margaret A. Johnson, Clifford L. Leen, Mark R. Nelson, Edmund Ong, Jonathan N. Weber, David J. White, Edmund Wilkins, Martin Wiselka.

**United States**

Ana Maria Alvarez-Jacinto, Diana Antoniskis, Barbara A. Atkinson, Daniel S. Berger, Gary Blick, Robert Owen Brenna, Jeffrey Howard Burack, L. W. Preston Church, Patrick

G. Clay, Paul Peniston Cook, Catherine Maria Creticos, Patrick William Daly, Getachew Feleke, Thomas Mc Donald File, Jeffrey Eliot Galpin, Stephen Lloyd Green, Frances Fae Haas, Barbara J. Hanna, Chiu-Bin Hsiao, Ricky K. Hsu, Robert S. Jones, Peter Kadlecik, Robert Charles Kalayjian, Robert H. Keller, Shubha Kerkar, Janak Koirala, Leon Liang-Yu Lai, Sujata Lalla-Reddy, Rodger David Macarthur, Gregory John Malanoski, Norman Peter Markowitz, Patrick L. McLeroth, Alexander A. McMeeking, Goran Miljkovic, John Buscemi Montana, Daniel Edward Nixon, Dorece G. Norris, Jesse Pullen Penico, Leonel Perez-Limonte, Lynette H. Posorske, David James Prelutsky, James Riddell, Barry Michael Rodwick, Peter Jerome Ruane, James Sampson, Steven Santiago, Amy Seinfeld, Victoria Lee Sharp, Zaher Shebib, Mark Leslie Tanner, Joseph G. Timpone, Barbara H. Wade, Frances Wallach, Winkler Weinberg, Christine Zurawski.

### **All causality treatment-emergent adverse events in HIV/HBV and HIV/HCV co-infected patients in the MOTIVATE 1 and 2 clinical trials**

Among patients co-infected with HBV or HCV in the MOTIVATE 1 and 2 studies the incidence of treatment-emergent adverse events (all causality) was similar across treatment groups and was not significantly different from those patients who were not co-infected.

- Adverse event profile in HIV/HCV co-infected patients
  - Taking in to account the small numbers and differences in group size (15 patients in the maraviroc once daily group, 29 in the maraviroc twice daily group and 20 in the placebo group), the total numbers of adverse events reported (80, 126 and 104 for the maraviroc once daily, maraviroc twice daily and placebo groups, respectively) were similar across treatment groups (data not corrected for exposure). There were 8 Grade 3 or 4 adverse events reported in the maraviroc once daily group, 26 in the maraviroc twice daily group and 12 in the placebo group. Given the small number of patients, no conclusion can be made regarding the incidence of particular adverse event terms.
  - Hepatobiliary disorders of any grade were rare and only reported in the maraviroc twice daily group in 4/29 patients. Severity ranged from Grade 1 (hepatosplenomegaly) to Grade 4 (hepatic failure).
- Adverse event profile in HIV/HBV co-infected patients
  - Taking in to account the small numbers and differences in group size (22 patients in the maraviroc once daily group, 28 in the maraviroc twice daily group and 17 in the placebo group) the total numbers of adverse events reported (92, 173 and 86 for the maraviroc once daily, maraviroc twice daily and placebo groups, respectively) were similar across treatment groups (data not corrected for duration of exposure). There were 11 Grade 3 or 4 adverse events reported in the maraviroc once daily group, 25 in the maraviroc twice daily group and 11 in the placebo group. Given the small number of patients, no conclusion can be made regarding the incidence of particular adverse event terms.
  - Hepatobiliary disorders of any grade were rare. Cytolytic hepatitis was recorded for one HBV/HIV co-infected patient in the placebo group. No hepatobiliary adverse events were recorded for HBV/HIV co-infected patients in the maraviroc groups.
